# Supplementary material for: Nutritional Metabolites of Red Pigmented Lettuce (Lactuca sativa) Germplasm and Correlations with Selected Phenotypic Characters
Source: MDPI journal article supplement (doi:10.3390/foods10102504), 2021-10-19
Supplement: s1 [file s1]

**Nutritional Metabolites of Red Pigmented Lettuce (*Lactuca sativa*) Germplasm Collection and Correlations with Selected Phenotypic Characters**

**Awraris Derby Assefa <sup>†</sup>, On-Sook Hur <sup>†</sup>, Bum-Soo Hahn, Bichsaem Kim, Na-Young Ro  
and Ju-Hee Rhee\***

National Agrobiodiversity Center, National Institute of Agricultural Sciences, RDA, Jeonju 54874, Korea; awraris@korea.kr (A.D.A); oshur09@korea.kr (O.-S.H); bshahn@korea.kr (B.-S.H.); bsam92@korea.kr (B.K.); nonanona@korea.kr (N.-Y.R.)

\* Correspondence: rheehk@korea.kr

<sup>†</sup> These authors contributed equally to this work.

Figure S1. External standard calibration curves of hydroxycinnamoyl derivatives, flavone, and flavonols

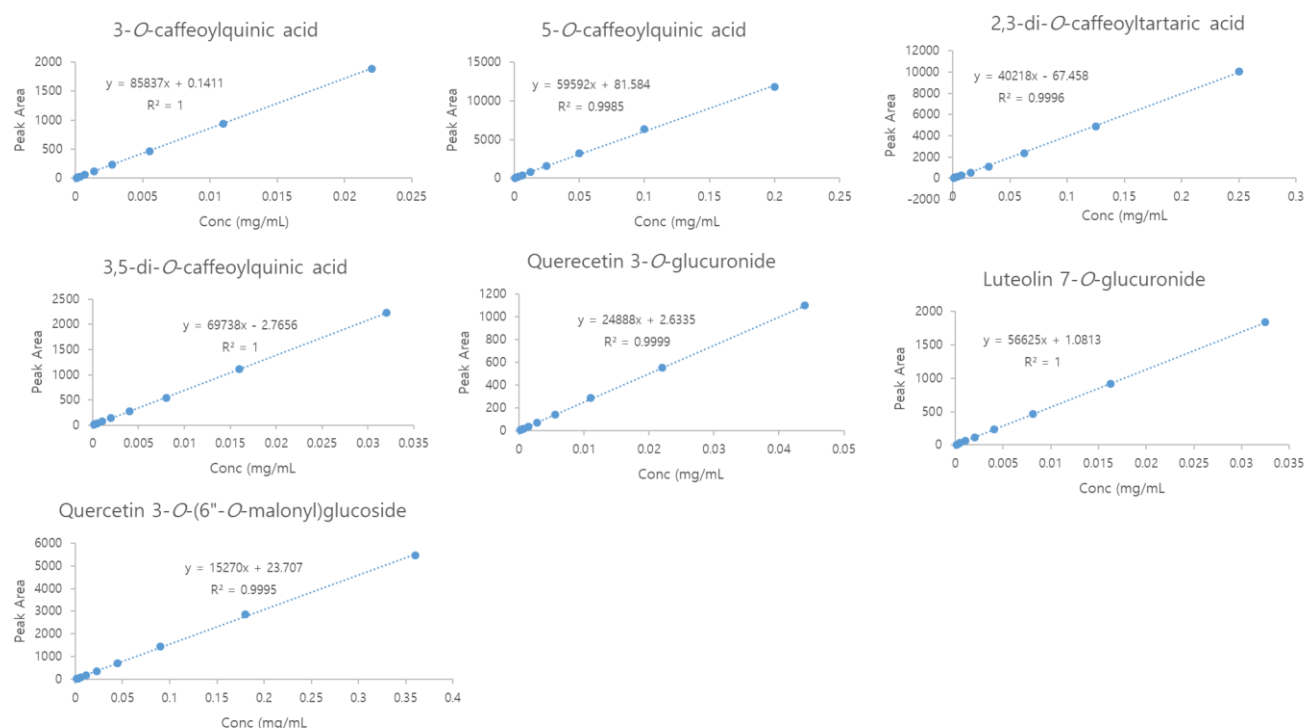

Figure S2. Modified International Union for the Protection of new Varieties of Plants (UPOV) descriptions pictorial explanation for selected individual characteristics (NB: Figures are adapted from UPOV, Guidelines for the conduct of tests for distinctness, uniformity and stability, [www.upov.int](http://www.upov.int) accessed on July 30, 2021)

Plant Botanical name: *Lactuca sativa* L.

# I. Plant growth type

## A. Butterhead

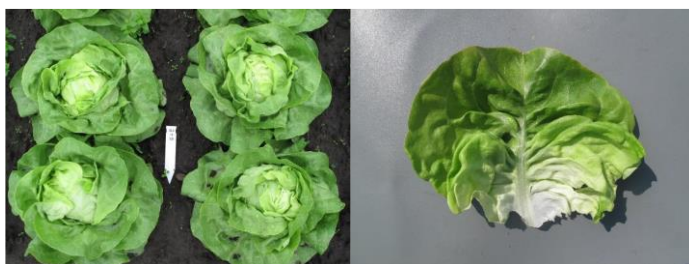

## B. Cos/romaine

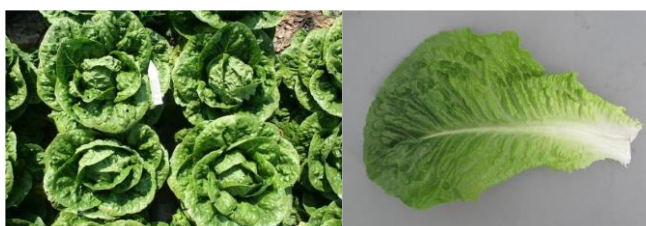

### C. Leafy

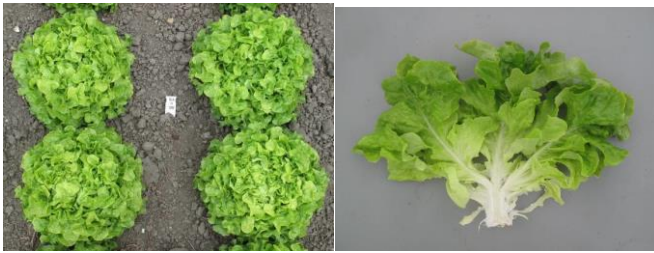

### D. Stem

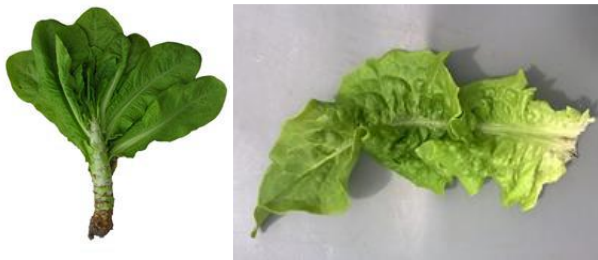

## II. Leaf attitude

|                      |  |
|----------------------|--|
| Erect                |  |
| Semi erect           |  |
| Prostrate/horizontal |  |

## III. Leaf shape

|                 |  |          |  |
|-----------------|--|----------|--|
| Narrow elliptic |  | Circular |  |
| Medium elliptic |  | Obovate  |  |

|                     |                                                                                   |                  |                                                                                     |
|---------------------|-----------------------------------------------------------------------------------|------------------|-------------------------------------------------------------------------------------|
| Broad elliptic      |  | Broad obtrullate |  |
| Transverse elliptic |  |                  |                                                                                     |

Figure S3. A representative UPLC-PDA chromatogram of anthocyanins from lettuce extract (top) and cyanidin-3-*O*-glucoside standard (bottom) at 520 nm. Peaks identified as 1, cyanidin-3-*O*-glucoside; 2, cyanidin 3-*O*-(3''-*O*-malonyl)glucoside; 3, and cyanidin 3-*O*-(6''-*O*-malonyl)glucoside.

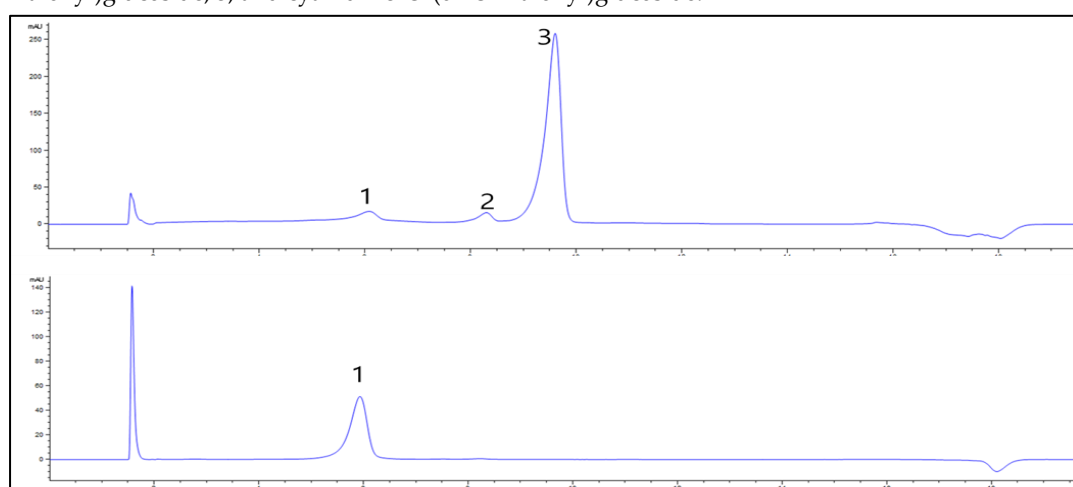

Figure S4. A representative UPLC-PDA chromatogram of lettuce extract (top) and a mixture of standard compounds (bottom) at 350 nm. Peaks identified as 1, 3-*O*-caffeoylquinic acid; 2, 5-*O*-caffeoylquinic acid; 3, 2,3 di-*O*-caffeoyltartaric acid; 4, quercetin 3-*O*-glucuronide; 5, luteolin 7-*O*-glucuronide; 6, quercetin 3-*O*-(6''-*O*-malonyl)glucoside; and 7, 3,5-di-*O*-caffeoylquinic acid

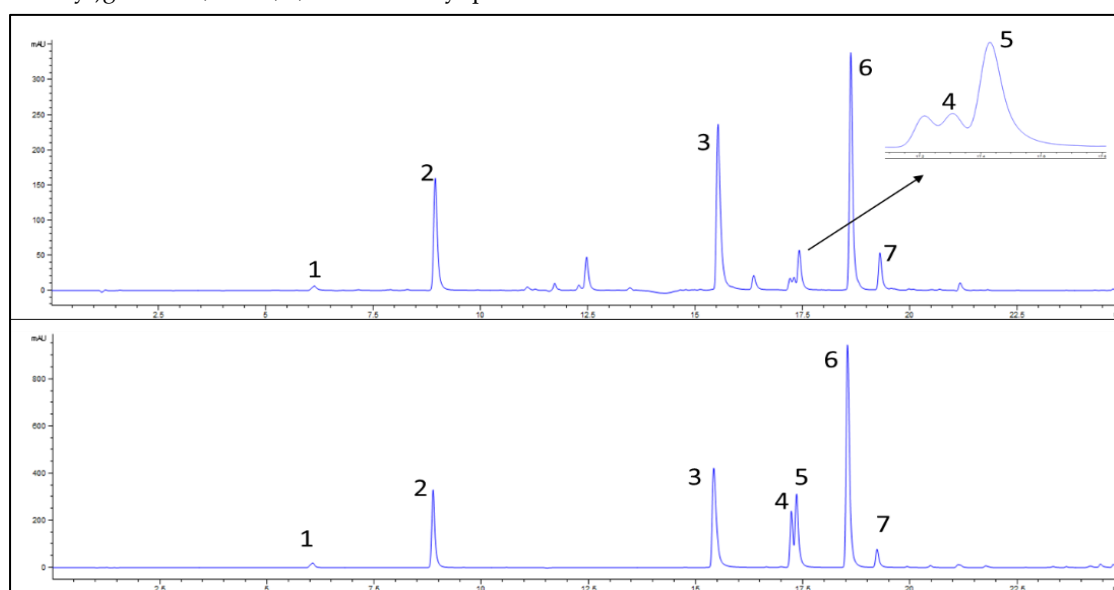

Figure S5. MS spectra in positive ion mode of hydroxycinnamoyl derivatives, flavones and flavonols identified in lettuce samples.

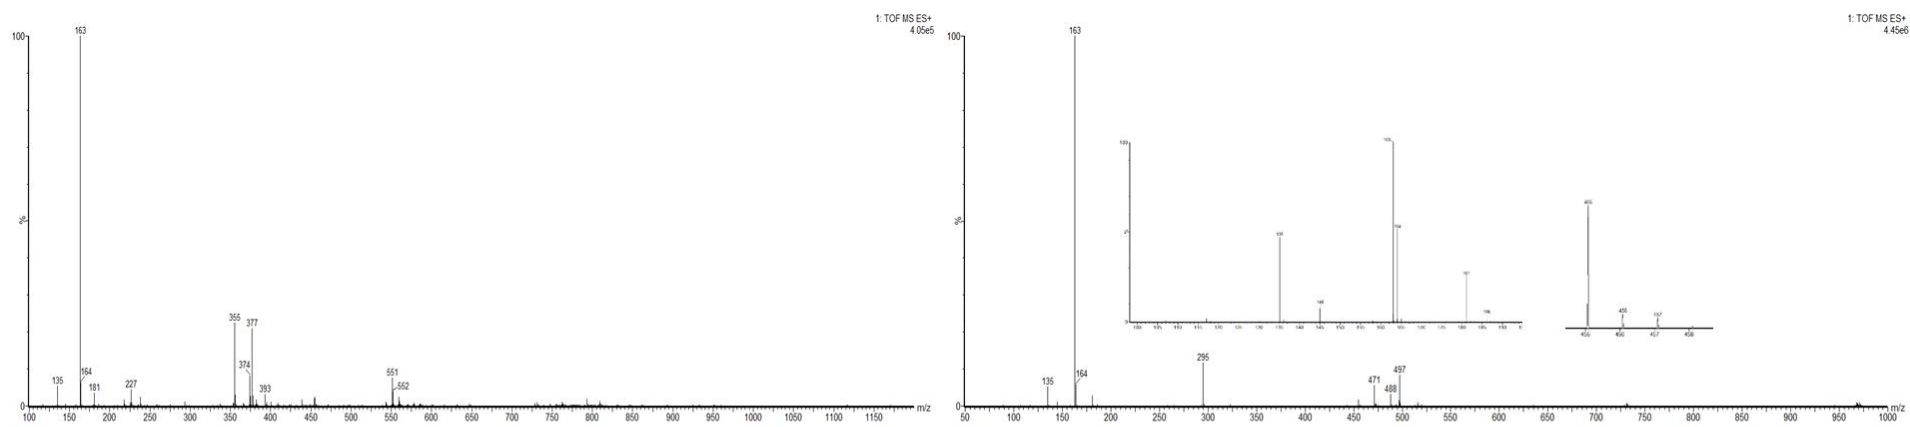

3-Caffeoylquinic acid

2,3 Dicafeoyltartaric acid

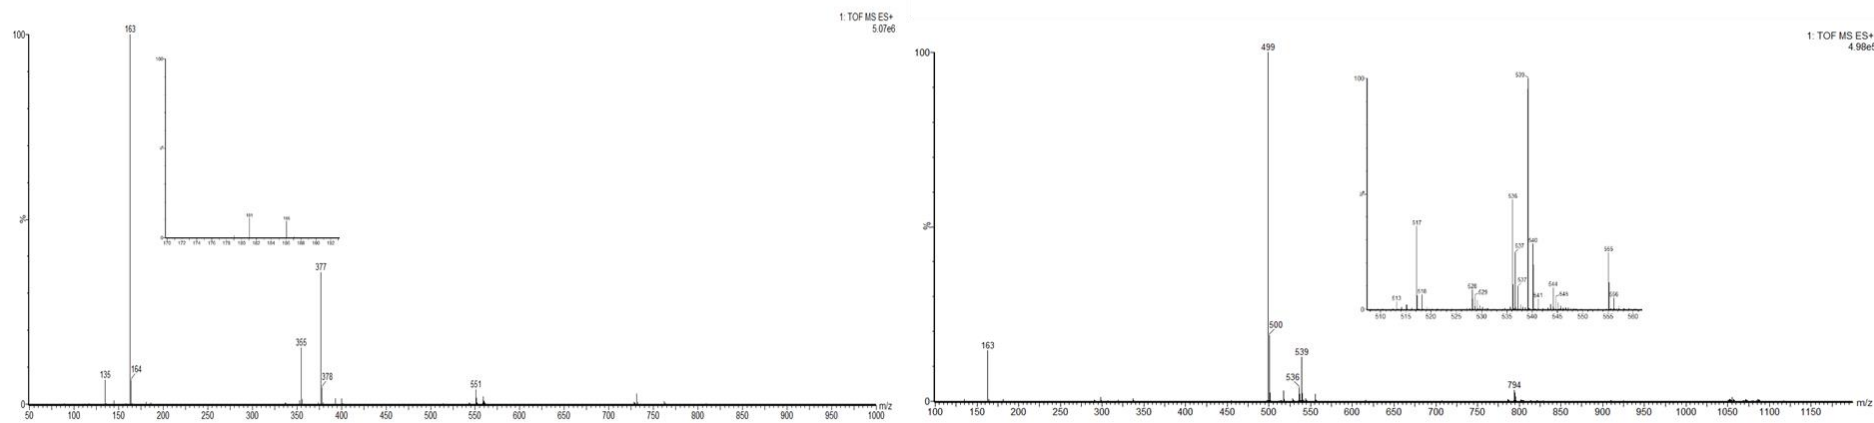

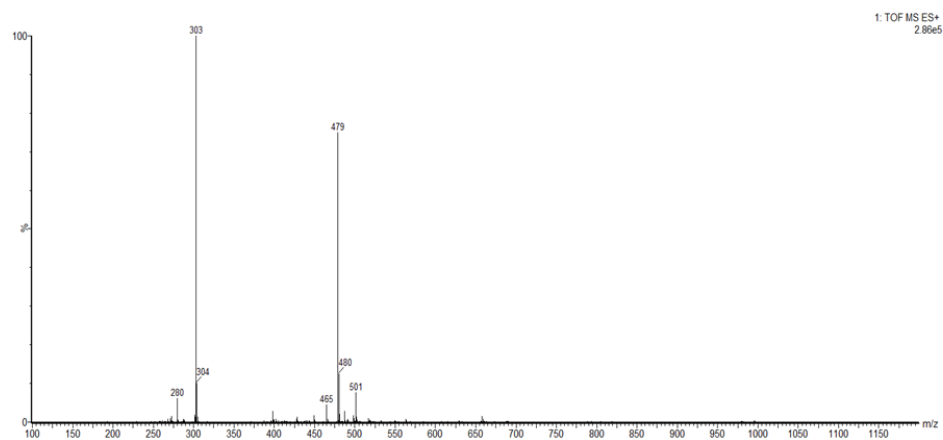

Quercetin 3-O-glucuronide

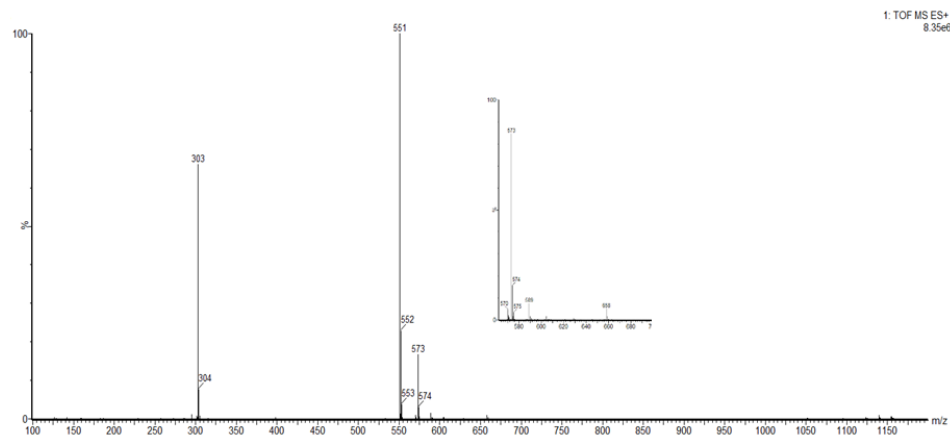

Quercetin 3-O-(6''-malonyl)glucoside

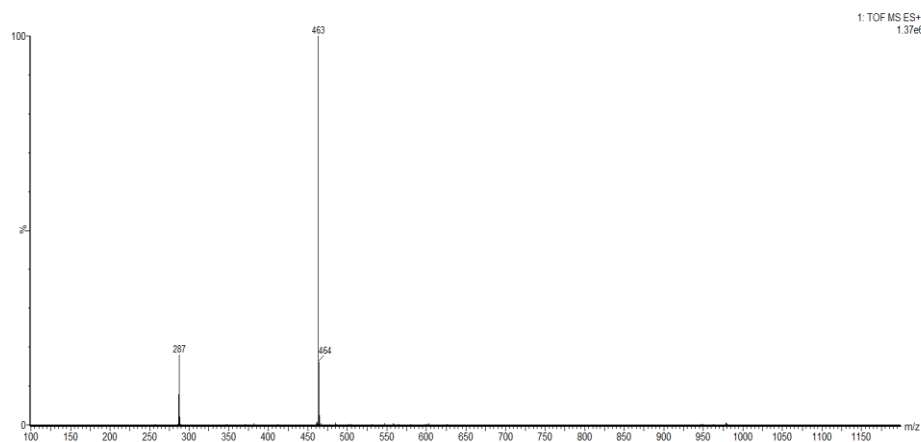

Luteolin 7-O-glucuronide

**Table S1.** Morphological characterization of lettuce (*Lactuca sativa* L.) made at the harvest maturity based on guidelines for the conduct of tests for distinctness, uniformity, and stability of modified International Union for the Protection of New Varieties of Plants (UPOV) descriptors.

| S/No | IT No  | CRC | PGT | IRCOL | LA | LS | LB:<br>DUM | LB:<br>DIMAP | LL*<br>(cm) | LW*<br>(cm) | PW*<br>(g) |
|------|--------|-----|-----|-------|----|----|------------|--------------|-------------|-------------|------------|
| 1    | 217012 | 1   | 3   | 3     | 2  | 2  | 1          | 1            | 30.5        | 16.3        | 235.0      |
| 2    | 218395 | 0   | 4   | 3     | 2  | 2  | 2          | 3            | 28.7        | 16.7        | 168.3      |
| 3    | 218396 | 0   | 2   | 3     | 2  | 6  | 3          | 2            | 23.3        | 21.5        | 166.7      |
| 4    | 219841 | 0   | 2   | 4     | 2  | 5  | 2          | 3            | 34.3        | 18.0        | 580.0      |
| 5    | 220010 | 0   | 3   | 4     | 1  | 2  | 1          | 1            | 33.7        | 15.8        | 290.0      |
| 6    | 228752 | 1   | 2   | 2     | 2  | 2  | 3          | 4            | 23.7        | 20.5        | 123.3      |
| 7    | 228753 | 1   | 2   | 3     | 2  | 2  | 3          | 4            | 21.2        | 23.0        | 165.0      |
| 8    | 228760 | 1   | 2   | 3     | 2  | 2  | 2          | 3            | 28.3        | 16.8        | 135.0      |
| 9    | 228871 | 1   | 2   | 3     | 2  | 1  | 3          | 4            | 23.3        | 20.7        | 190.0      |
| 10   | 231265 | 0   | 2   | 3     | 2  | 4  | 3          | 4            | 21.7        | 21.0        | 148.3      |
| 11   | 231521 | 0   | 2   | 4     | 2  | 4  | 3          | 4            | 18.5        | 20.5        | 173.3      |
| 12   | 231524 | 1   | 2   | 4     | 2  | 4  | 3          | 4            | 22.2        | 24.3        | 211.7      |
| 13   | 231525 | 1   | 2   | 4     | 2  | 4  | 3          | 4            | 22.0        | 20.7        | 153.3      |
| 14   | 231526 | 1   | 2   | 4     | 2  | 4  | 3          | 4            | 24.3        | 24.8        | 168.3      |
| 15   | 231527 | 0   | 2   | 3     | 2  | 4  | 3          | 4            | 23.8        | 20.7        | 255.0      |
| 16   | 231529 | 1   | 2   | 3     | 2  | 2  | 2          | 3            | 28.2        | 22.3        | 315.0      |
| 17   | 231531 | 0   | 2   | 2     | 2  | 4  | 3          | 4            | 21.3        | 23.0        | 293.3      |
| 18   | 231532 | 0   | 2   | 3     | 2  | 4  | 3          | 4            | 20.1        | 22.7        | 316.7      |
| 19   | 235353 | 0   | 2   | 3     | 2  | 2  | 2          | 1            | 16.0        | 8.7         | 68.3       |
| 20   | 242970 | 0   | 2   | 1     | 2  | 3  | 2          | 3            | 31.7        | 16.7        | 265.0      |
| 21   | 247142 | 1   | 2   | 2     | 2  | 4  | 3          | 4            | 24.7        | 26.0        | 230.0      |
| 22   | 251824 | 0   | 2   | 3     | 2  | 3  | 2          | 1            | 29.3        | 16.7        | 96.7       |
| 23   | 259307 | 1   | 2   | 2     | 2  | 4  | 3          | 4            | 13.5        | 15.8        | 65.0       |
| 24   | 260857 | 0   | 2   | 2     | 2  | 2  | 1          | 1            | 21.5        | 13.3        | 95.0       |
| 25   | 264962 | 0   | 1   | 1     | 2  | 3  | 1          | 1            | 18.3        | 12.3        | 226.7      |
| 26   | 264963 | 0   | 1   | 1     | 2  | 3  | 1          | 1            | 18.3        | 12.3        | 226.7      |
| 27   | 264964 | 0   | 2   | 3     | 2  | 2  | 2          | 1            | 27.2        | 15.6        | 186.7      |
| 28   | 264965 | 0   | 2   | 1     | 3  | 2  | 2          | 1            | 24.2        | 13.6        | 103.3      |
| 29   | 264970 | 0   | 2   | 1     | 2  | 4  | 3          | 4            | 21.2        | 22.7        | 250.0      |
| 30   | 264971 | 0   | 2   | 3     | 2  | 4  | 3          | 4            | 24.2        | 22.7        | 280.0      |
| 31   | 264972 | 0   | 2   | 3     | 2  | 3  | 2          | 1            | 97.1        | 21.8        | 201.7      |
| 32   | 264973 | 0   | 2   | 2     | 2  | 3  | 2          | 1            | 28.2        | 17.5        | 248.3      |
| 33   | 264974 | 0   | 2   | 4     | 3  | 3  | 2          | 1            | 28.8        | 23.6        | 265.0      |
| 34   | 267591 | 0   | 2   | 1     | 2  | 3  | 1          | 1            | 32.0        | 12.0        | 235.0      |
| 35   | 271099 | 0   | 2   | 2     | 2  | 2  | 1          | 1            | 27.7        | 18.2        | 445.0      |
| 36   | 271117 | 1   | 2   | 3     | 2  | 4  | 3          | 4            | 19.8        | 17.3        | 225.0      |
| 37   | 271118 | 0   | 2   | 2     | 2  | 2  | 1          | 1            | 42.5        | 17.2        | 430.0      |
| 38   | 271119 | 0   | 2   | 3     | 2  | 3  | 1          | 1            | 28.5        | 14.5        | 323.3      |
| 39   | 271120 | 0   | 2   | 3     | 2  | 4  | 3          | 4            | 22.7        | 23.5        | 280.0      |
| 40   | 271159 | 0   | 2   | 3     | 2  | 7  | 2          | 1            | 27.8        | 19.7        | 371.7      |
| 41   | 217005 | 0   | 2   | 3     | 2  | 4  | 3          | 1            | 22.8        | 23.8        | 301.7      |
| 42   | 276155 | 0   | 2   | 3     | 2  | 4  | 3          | 1            | 20.5        | 20.8        | 271.7      |
| 43   | 100511 | 0   | 2   | 1     | 2  | 4  | 2          | 3            | 27.8        | 26.2        | 641.7      |
| 44   | 100514 | 0   | 2   | 1     | 2  | 4  | 2          | 3            | 22.2        | 22.5        | 245.0      |
| 45   | 100516 | 0   | 2   | 1     | 2  | 3  | 2          | 3            | 20.5        | 20.7        | 261.7      |
| 46   | 101048 | 0   | 2   | 2     | 2  | 2  | 1          | 3            | 29.0        | 17.5        | ND         |
| 47   | 101236 | 0   | 2   | 4     | 2  | 2  | 1          | 1            | 29.3        | 15.7        | 400.0      |
| 48   | 102664 | 0   | 2   | 2     | 2  | 2  | 1          | 1            | 32.0        | 16.3        | 270.0      |
| 49   | 102785 | 0   | 2   | 2     | 2  | 2  | 1          | 1            | 29.8        | 16.3        | 401.7      |
| 50   | 103152 | 0   | 2   | 3     | 2  | 2  | 1          | 3            | 30.2        | 15.0        | 301.7      |

|     |                  |   |   |   |   |   |   |   |      |      |       |
|-----|------------------|---|---|---|---|---|---|---|------|------|-------|
| 51  | 104513           | 0 | 2 | 1 | 2 | 2 | 1 | 3 | 29.7 | 19.8 | 346.7 |
| 52  | 108868           | 0 | 2 | 2 | 2 | 2 | 1 | 1 | 24.8 | 23.8 | 295.0 |
| 53  | 110820           | 0 | 2 | 3 | 2 | 2 | 1 | 3 | 24.3 | 19.7 | 223.3 |
| 54  | 113396           | 0 | 2 | 2 | 2 | 2 | 1 | 3 | 24.0 | 17.5 | ND    |
| 55  | 138082           | 0 | 2 | 2 | 2 | 2 | 1 | 1 | 33.0 | 17.8 | 395.0 |
| 56  | 178618           | 0 | 2 | 2 | 2 | 2 | 1 | 3 | 25.0 | 22.0 | 351.7 |
| 57  | 180492           | 0 | 2 | 2 | 2 | 2 | 1 | 3 | 24.7 | 21.0 | 258.3 |
| 58  | 181983           | 0 | 2 | 2 | 2 | 7 | 2 | 3 | 21.8 | 22.5 | 325.0 |
| 59  | 185751           | 0 | 2 | 4 | 2 | 2 | 1 | 3 | 29.8 | 12.8 | 200.0 |
| 60  | 195057           | 0 | 2 | 2 | 2 | 2 | 1 | 3 | 28.7 | 17.7 | 348.3 |
| 61  | 195058           | 0 | 2 | 2 | 2 | 2 | 1 | 3 | 25.5 | 25.0 | 485.0 |
| 62  | 203380           | 0 | 2 | 3 | 2 | 7 | 1 | 3 | 26.8 | 21.0 | 288.3 |
| 63  | 203381           | 0 | 2 | 3 | 2 | 7 | 1 | 1 | 24.0 | 26.0 | 388.3 |
| 64  | 204097           | 0 | 2 | 3 | 2 | 2 | 1 | 3 | 25.3 | 15.5 | ND    |
| 65  | 206716           | 0 | 2 | 2 | 2 | 2 | 1 | 1 | 22.7 | 10.7 | 73.3  |
| 66  | 206800           | 1 | 3 | 2 | 1 | 3 | 1 | 1 | 30.0 | 16.8 | 355.0 |
| 67  | 206823           | 0 | 2 | 3 | 2 | 7 | 2 | 3 | 27.7 | 24.7 | 321.7 |
| 68  | 213458           | 0 | 2 | 2 | 2 | 7 | 2 | 1 | 20.0 | 19.3 | 198.3 |
| 69  | 213460           | 0 | 2 | 2 | 2 | 7 | 2 | 1 | 22.3 | 20.7 | 366.7 |
| 70  | 215799           | 0 | 2 | 1 | 3 | 2 | 1 | 1 | 25.2 | 13.2 | 318.3 |
| 71  | 215802           | 1 | 3 | 2 | 1 | 2 | 1 | 4 | 28.8 | 18.3 | 543.3 |
| 72  | 216990           | 0 | 4 | 3 | 2 | 1 | 1 | 3 | 45.5 | 11.2 | 448.3 |
| 73  | 217391           | 0 | 2 | 2 | 2 | 2 | 2 | 3 | 22.0 | 26.7 | 351.7 |
| 74  | 217504           | 0 | 2 | 2 | 2 | 6 | 2 | 4 | 19.3 | 16.5 | 105.0 |
| 75  | 217844           | 1 | 2 | 1 | 2 | 7 | 3 | 4 | 18.0 | 27.0 | 182.5 |
| 76  | 218010           | 1 | 2 | 3 | 2 | 2 | 1 | 3 | 32.7 | 17.0 | 495.0 |
| 77  | 218329           | 1 | 2 | 2 | 2 | 2 | 1 | 3 | 31.3 | 16.7 | 226.7 |
| 78  | 219838           | 0 | 2 | 3 | 2 | 2 | 1 | 4 | 26.0 | 16.5 | 358.3 |
| 79  | 219884           | 1 | 2 | 4 | 2 | 3 | 1 | 3 | 26.0 | 20.0 | 420.0 |
| 80  | 220036           | 1 | 2 | 3 | 3 | 7 | 2 | 1 | 25.0 | 24.7 | 323.3 |
| 81  | 220742           | 1 | 2 | 2 | 2 | 6 | 3 | 3 | 19.7 | 21.7 | 255.0 |
| 82  | 220743           | 1 | 2 | 4 | 2 | 2 | 2 | 3 | 24.3 | 15.0 | 230.0 |
| 83  | 251813           | 0 | 2 | 2 | 2 | 3 | 2 | 3 | 26.0 | 25.3 | 363.3 |
| 84  | 195215           | 0 | 2 | 2 | 3 | 2 | 1 | 1 | 33.3 | 15.5 | 395.0 |
| 85  | 213461           | 0 | 1 | 2 | 2 | 4 | 1 | 2 | 20.0 | 24.3 | 550.0 |
| 86  | 228749           | 1 | 2 | 2 | 2 | 3 | 2 | 3 | 23.0 | 19.0 | 236.3 |
| 87  | 251825           | 0 | 2 | 2 | 3 | 3 | 1 | 1 | 26.5 | 18.8 | 490.0 |
| 88  | 251826           | 0 | 2 | 3 | 3 | 3 | 1 | 1 | 27.8 | 18.5 | 510.0 |
| 89  | 262380           | 0 | 2 | 3 | 3 | 5 | 3 | 3 | 24.7 | 26.7 | 596.7 |
| 90  | 262402           | 0 | 2 | 4 | 3 | 4 | 3 | 3 | 22.3 | 24.3 | 333.3 |
| 91  | 262406           | 0 | 2 | 3 | 3 | 3 | 2 | 1 | 24.2 | 26.6 | 548.3 |
| 92  | 262407           | 0 | 2 | 4 | 2 | 2 | 1 | 3 | 30.7 | 18.7 | 541.7 |
| 93  | 262409           | 0 | 2 | 2 | 3 | 5 | 2 | 4 | 21.2 | 23.8 | 605.0 |
| 94  | 262411           | 0 | 2 | 3 | 3 | 4 | 3 | 1 | 24.5 | 28.2 | 596.7 |
| 95  | 271138           | 0 | 1 | 3 | 3 | 3 | 1 | 1 | 19.7 | 19.8 | 346.7 |
| 96  | 271139           | 0 | 1 | 3 | 2 | 5 | 1 | 1 | 18.8 | 22.9 | 378.3 |
| 97  | 271148           | 1 | 2 | 2 | 2 | 3 | 1 | 3 | 24.8 | 18.5 | 188.7 |
| 98  | 276099           | 0 | 2 | 2 | 2 | 3 | 1 | 3 | 20.5 | 12.3 | 128.0 |
| 99  | 280087           | 0 | 2 | 4 | 3 | 2 | 1 | 1 | 27.4 | 20.2 | 531.7 |
| 100 | 280088           | 0 | 2 | 4 | 3 | 3 | 1 | 3 | 27.2 | 17.5 | 533.3 |
| 101 | 296684           | 0 | 2 | 4 | 2 | 2 | 2 | 3 | 27.7 | 17.2 | 348.3 |
| 102 | 301289           | 1 | 2 | 4 | 3 | 3 | 3 | 1 | 25.7 | 24.7 | 331.7 |
| 103 | 301994           | 0 | 2 | 3 | 2 | 3 | 2 | 3 | 20.7 | 21.8 | 395.0 |
| 104 | 302032           | 0 | 2 | 3 | 2 | 4 | 2 | 4 | 24.2 | 25.5 | 443.3 |
| 105 | 302033           | 0 | 2 | 5 | 3 | 4 | 3 | 1 | 13.7 | 14.6 | 125.0 |
| 106 | Seonpung plus ** | 0 | 2 | 4 | 3 | 4 | 3 | 4 | 23.0 | 26.5 | 438.0 |



|     |                              |   |   |   |   |   |   |   |      |      |       |
|-----|------------------------------|---|---|---|---|---|---|---|------|------|-------|
| 107 | Jeokromaine<br>dessertrosa** | 1 | 3 | 5 | 1 | 2 | 1 | 1 | 24.6 | 14.5 | 217.3 |
| 108 | Jinbbal**                    | 0 | 2 | 3 | 3 | 4 | 3 | 4 | 22.0 | 26.1 | 447.3 |
| 109 | Nonghyeopheukchima**         | 0 | 2 | 3 | 3 | 3 | 3 | 4 | 19.1 | 23.8 | 412.0 |
| 110 | Sinhong<br>jeokchukmyeon**   | 0 | 2 | 3 | 3 | 3 | 3 | 4 | 21.6 | 24.6 | 558.0 |
| 111 | Sambokmeokchima**            | 1 | 2 | 5 | 2 | 2 | 2 | 3 | 20.0 | 12.8 | 158.0 |
| 112 | Power red romaine **         | 1 | 2 | 5 | 2 | 3 | 2 | 3 | 26.1 | 18.8 | 269.3 |
| 113 | Superseonpung **             | 0 | 2 | 4 | 2 | 3 | 2 | 3 | 25.1 | 20.0 | 494.6 |

\*Mean of 10 plants/leaves; \*\* Commercial cultivars; CRC = Cotyledon red color, 0 absent and 1 present; PGT = Plant growth type, 1 butterhead, 2 leaf, 3 romaine, and 4 stem; IRCOL = Intensity of red color of outer leaves, 1 very light, 2 light, 3 medium, 4 dark, and 5 very dark; LA = leaf attitude, 1 erect, 2 semi erect, and 3 prostrate; LS = Leaf shape, 1 narrow elliptic, 2 medium elliptic, 3 broad elliptic, 4 circular, 5 transverse elliptic, 6 obovate, and 7 broad obtrullate; LB:DUM = Leaf blade: degree of undulation of margin, 1 weak, 2 medium, and 3 strong; LB:DIMAP = Leaf blade: density of incisions on margin on apical part, 1 sparse, 2 medium, 3 dense, and 4 very dense; LL = Leaf length; LW = Leaf width; PW = Plant weight; ND = Not determined; IT NO = introduction number

**Table S2.** The contents of metabolites from 113 germplasm collection and commercial cultivars of lettuce (*Lactuca sativa* L.) samples

| S/No | Hydroxycinnamoyl derivatives (µg/g DW) |               |                |              |         | Flavones and flavonols (µg/g DW) |             |              |         | Anthocyanins (µg/g DW) |           |             |        | ABTS<br>(µg TE/g DW) | TPC<br>(µgGAE/g DW) |
|------|----------------------------------------|---------------|----------------|--------------|---------|----------------------------------|-------------|--------------|---------|------------------------|-----------|-------------|--------|----------------------|---------------------|
|      | 3-CQA                                  | 5-CQA         | 2,3-DCTA       | 3,5-DCQA     | Total   | Q3-G                             | L7-G        | Q3-6"MG      | Total   | C3-G                   | C3-3"MG   | C3-6"MG     | Total  |                      |                     |
| 1    | 532.1±18.7                             | 5100.6±83.7   | 16718±2026.7   | 1055.4±19    | 23406.1 | 5701±158.2                       | 131.8±2.3   | 8804.9±242   | 14637.7 | ND                     | 46.4±0.8  | 2385.9±45.2 | 2432.3 | 79428.7±190.6        | 89536.2±1265        |
| 2    | 229±18.9                               | 15500.4±272.6 | 12303.1±1569.1 | 2111.8±44.2  | 30144.3 | 2693.5±362                       | 350.5±15.2  | 7175.2±203.1 | 10219.2 | ND                     | 44.4±1.4  | 2303.3±40.6 | 2347.7 | 78365.9±143.6        | 102868.5±25.1       |
| 3    | 318.5±19.2                             | 10718.7±310.3 | 12976.7±1617.4 | 1375.2±79.5  | 25389.1 | 2530.5±357.8                     | 192.7±10    | 4394.1±130.5 | 7117.3  | ND                     | 13±0.6    | 1183.8±19.1 | 1196.8 | 79618.3±101.2        | 94161.4±1350.3      |
| 4    | 266.4±17.4                             | 5832.5±133.5  | 6300.5±993.4   | 957.4±26.8   | 13356.8 | 1567±191.3                       | 158.5±5.5   | 3172.4±85.1  | 4897.9  | ND                     | 10.8±0.2  | 1093±17.2   | 1103.8 | 72647.9±110.5        | 65220.4±329.6       |
| 5    | 438.9±20.4                             | 1892.8±11.9   | 9587.2±949.9   | 898.6±46     | 12817.5 | 1520.9±82.3                      | 74.1±0.6    | 1750.5±38.5  | 3345.5  | ND                     | ND        | 341.2±9.1   | 341.2  | 71444.5±22.2         | 61066.7±236.8       |
| 6    | 249.7±13.7                             | 7545.3±312    | 9405.4±1060.4  | 1285.3±82.5  | 18485.7 | 3321.5±27.6                      | 148.8±4.7   | 3609.3±139.3 | 7079.6  | ND                     | ND        | 371.2±15.2  | 371.2  | 74264.9±342.6        | 74054.2±27          |
| 7    | 152.2±10.9                             | 10497.4±400.9 | 9260±1300.9    | 941.2±34.3   | 20850.8 | 7990.3±210.2                     | 192.8±4.8   | 7758.1±304.6 | 15941.2 | ND                     | 5.8±0.6   | 956.8±9     | 962.6  | 76660.9±204.4        | 84596.2±219.2       |
| 8    | 185.4±19.7                             | 10716±513.3   | 8105.7±1193.9  | 1018.7±82.4  | 20025.8 | 2150±258.7                       | 243.6±14    | 5076.6±265.1 | 7470.2  | ND                     | 8.3±0.8   | 995.4±11.9  | 1003.7 | 77070.3±177.4        | 82546±305.2         |
| 9    | 403.5±47.5                             | 5417.5±330.7  | 12019.1±1845   | 648.2±34     | 18488.3 | 2663.4±374.4                     | 71.2±3.9    | 3923.5±272.6 | 6658.1  | ND                     | ND        | 624.4±20.5  | 624.4  | 75184.8±110.4        | 72855.6±243.5       |
| 10   | 353.9±35                               | 9984.9±569.7  | 13129.7±1812.8 | 1404.8±64    | 24873.3 | 2998.9±401.2                     | 159.4±8.4   | 4199±246.7   | 7357.3  | ND                     | ND        | 625.9±10    | 625.9  | 78748.6±234          | 81877.5±284.6       |
| 11   | 202.8±15.4                             | 8055.1±409.4  | 7959.7±1019    | 892.1±49.8   | 17109.7 | 4610.9±550.2                     | 226.2±17.9  | 6308.5±362.1 | 11145.6 | 28.3±0.6               | 20.7±0.7  | 977.0±16.1  | 1026   | 72669.9±314.7        | 68864.5±500.1       |
| 12   | 354.6±31.1                             | 12301±412.3   | 15014.1±2158.1 | 1050±24.9    | 28719.7 | 4952.8±631.4                     | 684.1±26.7  | 9393±381.2   | 15029.9 | 157.2±3.2              | 130.1±2.7 | 3432.2±49.3 | 3719.5 | 78510.6±262.7        | 97264±464.1         |
| 13   | 235.8±10.6                             | 12950.6±216.4 | 12628.2±1392.6 | 994.6±32     | 26809.2 | 4319.4±198                       | 763.1±24.3  | 9529.8±229.2 | 14612.3 | 145.1±1.3              | 107.7±1   | 2882.6±25.1 | 3135.4 | 75684.4±198.8        | 89322.7±1202.4      |
| 14   | 234.6±16.4                             | 10091.2±173.4 | 10813.7±1251   | 862.5±16.6   | 22002   | 3960.3±397.9                     | 552.9±23    | 6763.9±169.5 | 11277.1 | 81.5±2.2               | 61.6±2    | 1848.9±40.7 | 1992   | 75059.1±225.9        | 79161.7±409.2       |
| 15   | 401±32.8                               | 5666.3±276.1  | 12978.2±1701.1 | 998.4±42.7   | 20043.9 | 2134±328.1                       | 148.8±9.8   | 3527.9±195.1 | 5810.7  | 36.9±2.9               | 24.1±1.8  | 945.4±37    | 1006.4 | 76488.7±280.5        | 72269.4±308.9       |
| 16   | 329.1±23.5                             | 4907.6±67.5   | 10852.4±1084.4 | 578.4±8.5    | 16667.5 | 4120±422.2                       | 389.4±16.1  | 5704.9±110.1 | 10214.3 | 133.9±2.3              | 31.6±0.8  | 1034.5±17.8 | 1200   | 74625.9±71.3         | 73377.9±630.4       |
| 17   | 295.3±27                               | 9560.5±328.1  | 12781.7±1782.6 | 1561.7±139   | 24199.2 | 5888.5±738.1                     | 251.7±13.6  | 6547.7±305.3 | 12687.9 | 108.2±2                | 20.9±0.4  | 805.2±7.6   | 934.3  | 76721.2±93.8         | 86600.1±284         |
| 18   | 268.9±26.6                             | 6586.4±90     | 10251±1217.6   | 480.2±7.1    | 17586.5 | 14861.7±198.7                    | 283.2±7.9   | 9307.3±168   | 24452.2 | 157.6±3                | 35.4±0.5  | 1127±8.9    | 1320   | 79816.2±50.1         | 82262.4±330.7       |
| 19   | 457.4±42.6                             | 5459.4±81     | 8174.7±1261.9  | 617.3±39.2   | 14708.8 | 1478±331.7                       | 1018.2±53.8 | 5955.3±186.7 | 8451.5  | 76.9±1.5               | 7.1±0.6   | 508.6±8.1   | 592.6  | 79354.3±82           | 80762.3±361.8       |
| 20   | 198.6±10.7                             | 1398.2±66.2   | 6359.3±646.9   | 629±22.8     | 8585.1  | 8856.4±261                       | 218.7±13.5  | 1216.1±63.5  | 10291.2 | ND                     | ND        | 69.6±1.1    | 69.6   | 59930.6±133.3        | 50225.6±431.4       |
| 21   | 90.3±5.0                               | 2021.9±19.3   | 3025.3±133.2   | 251.8±3.5    | 5389.3  | 979.6±136.6                      | 115.2±1.5   | 1766.4±17.6  | 2861.2  | ND                     | ND        | 67.2±1.2    | 67.2   | 52880.4±176.2        | 41268.3±158         |
| 22   | 152.9±12.5                             | 7340.8±212.4  | 7127.5±635     | 892.7±57.8   | 15513.9 | 1533.8±47.1                      | 223.7±4.5   | 4260.3±149.9 | 6017.8  | 48.1±1.0               | ND        | 391.8±6.6   | 439.9  | 73956.8±163.1        | 69165.4±273.8       |
| 23   | 186.4±11.6                             | 1632.4±21.2   | 5294.6±368.6   | 192.1±15.1   | 7305.5  | 2904.6±323.2                     | 83.5±1.8    | 4550.8±35.9  | 7538.9  | ND                     | ND        | 86.8±1.8    | 86.8   | 66699.4±255.7        | 50705.6±137.9       |
| 24   | 425.7±56.8                             | 2037.6±114.1  | 9670.9±1206.8  | 652.8±65     | 12787   | 1808.1±87.4                      | 1008.2±68.7 | 4707.8±242.8 | 7524.1  | ND                     | ND        | 142±3.8     | 142    | 72908.9±163.7        | 63678.3±89.9        |
| 25   | 399.6±50.8                             | 4129±120      | 12342.6±1556.8 | 723.1±62.7   | 17594.3 | 1717±91.1                        | 112.5±0.9   | 1186.1±33.2  | 3015.6  | ND                     | ND        | 49.6±1.1    | 49.6   | 75823±33.6           | 64700.5±345.8       |
| 26   | 349.4±49.4                             | 2987.7±34.8   | 8558.5±1305.1  | 348.4±4.7    | 12244   | 1400.9±86.8                      | 94.1±3.5    | 948.1±35.9   | 2443.1  | ND                     | ND        | 37.6±0.9    | 37.6   | 69458.7±251.2        | 51678.7±227.5       |
| 27   | 202.2±33.9                             | 11149.7±311.2 | 10624.4±1796.5 | 1689.4±75    | 23665.7 | 1380.5±79                        | 176.4±9.9   | 4641.7±153.2 | 6198.6  | 295.2±9.3              | 54.5±2    | 1418.3±41.1 | 1768   | 76942.2±71.1         | 68499.9±854.7       |
| 28   | 611.7±98.5                             | 4973.9±197.9  | 19957.2±2783.7 | 2217.8±89.5  | 27760.6 | 4015±199.5                       | 767.2±40.9  | 7241.4±264.3 | 12023.6 | 126.5±1.7              | 21.4±0.5  | 815.7±9.5   | 963.6  | 79708.1±266.9        | 97028.5±158.1       |
| 29   | 187.7±31.7                             | 1428.6±49.6   | 4904.6±872.5   | 426.4±11.7   | 6947.3  | 2333.3±102.3                     | 33.5±0.5    | 1447.2±37.7  | 3814    | ND                     | ND        | 21.3±1.2    | 21.3   | 51911.9±120.9        | 41480±72.2          |
| 30   | 376.2±51.7                             | 1633.9±89.9   | 9344.2±1387.1  | 594.8±45.3   | 11949.1 | 885.3±96.8                       | 53.4±4.7    | 984.4±75.2   | 1923.1  | ND                     | ND        | 201.8±7.5   | 201.8  | 67399.7±263          | 49449.8±146.4       |
| 31   | 374.7±59.5                             | 6776.3±241.6  | 15118.4±2587.3 | 1164.6±100.3 | 23434   | 2157.6±163                       | 131.6±8.1   | 4488.4±197.4 | 6777.6  | 180.8±4.5              | 37.5±1.2  | 1139.8±17.5 | 1358.1 | 78912.5±90.5         | 83348.8±313.7       |
| 32   | 136.3±19.6                             | 3093.6±22.3   | 5262.8±777.3   | 749.1±31.1   | 9241.8  | 1012.9±37.5                      | 138.3±7.4   | 3124.5±34.7  | 4275.7  | 42.4±2.3               | ND        | 345.8±9.5   | 388.2  | 68973.5±204.2        | 48994.8±287.3       |
| 33   | 262.3±30                               | 4293.2±164.5  | 8261.9±1245.8  | 947.2±48.3   | 13764.6 | 960.3±70.6                       | 107.4±8.2   | 3026.4±157.4 | 4094.1  | 45.6±0.9               | ND        | 356.6±2.5   | 402.2  | 69376.1±171.9        | 60669.3±546.6       |
| 34   | 569.2±71.3                             | 2208.4±86.1   | 10979.5±1699.4 | 350.7±32.5   | 14107.8 | 5692.4±290.1                     | 233.5±11.1  | 3078.8±115.4 | 9004.7  | 18.7±1.7               | ND        | 228.8±3     | 247.5  | 71588.1±99.1         | 65895.4±988.5       |
| 35   | 164.4±23                               | 2449.7±31.8   | 5473.9±740.4   | 946.2±7      | 9034.2  | 2584.1±135.2                     | 91±3.6      | 2715±44.2    | 5390.1  | ND                     | ND        | 130.8±3.7   | 130.8  | 63579.6±195.7        | 45799.9±197.3       |
| 36   | 144.9±11.3                             | 1706.4±13.3   | 4089.3±430     | 203.5±2.8    | 6144.1  | 2991.4±212.9                     | 134.2±3     | 4704.1±84.5  | 7829.7  | ND                     | ND        | 115.3±1.1   | 115.3  | 62816.7±659          | 39528.5±110.2       |
| 37   | 166.1±26.9                             | 4001.5±225.7  | 5305.1±1071.1  | 748.5±41.4   | 10221.2 | 2021.4±96.4                      | 63±4.4      | 2253.4±130.5 | 4337.8  | ND                     | ND        | 172.9±3.5   | 172.9  | 67298.8±156.3        | 52515.3±250         |
| 38   | 146.1±21.7                             | 1731.9±51.3   | 3861.9±639.8   | 272.3±7.7    | 6012.2  | 1955±86.3                        | 205.3±12.4  | 2139.6±66.1  | 4299.9  | ND                     | ND        | 47.4±1.5    | 47.4   | 55474.9±122.2        | 34162.9±144.2       |
| 39   | 157.6±27.5                             | 5510.4±124.2  | 6884.2±1174    | 790.4±11.3   | 13342.6 | 5337.6±289.1                     | 212.7±6     | 6129.8±143.4 | 11680.1 | 52±4.3                 | ND        | 350.3±17.4  | 402.3  | 70975.1±83           | 63176.3±342.6       |
| 40   | 97.1±16.0                              | 3467.1±82.1   | 3277.3±626.9   | 447.1±11.3   | 7288.6  | 1735.3±166.5                     | 79±3.4      | 3388.4±86.3  | 5202.7  | 32.8±5.2               | ND        | 249.4±6.0   | 282.2  | 61110.7±250.9        | 47243.2±176.9       |
| 41   | 219.1±33.3                             | 9129.3±422.7  | 10950.8±2169.5 | 1015.5±71.4  | 21314.7 | 7425.5±207.7                     | 166.8±11.7  | 6611.3±339.3 | 14203.6 | 161.2±6.3              | 21.6±1.8  | 809.2±30.2  | 992    | 79185.2±131          | 81470.8±445.9       |
| 42   | 331.6±56.9                             | 9984.3±486.9  | 13100.8±2481.1 | 1214.2±163.2 | 24630.9 | 5731±92.8                        | 145.6±8.7   | 5014.4±264   | 10891   | 102.8±2.2              | 8.1±0.6   | 552.0±11.2  | 662.9  | 79654±126.2          | 84894.1±276.4       |

|    |            |               |                |             |         |               |             |               |         |           |           |             |        |               |                |
|----|------------|---------------|----------------|-------------|---------|---------------|-------------|---------------|---------|-----------|-----------|-------------|--------|---------------|----------------|
| 43 | 53.5±13.1  | 37.6±10.9     | 534.2±131.6    | 20.5±1      | 645.8   | 111.5±25.7    | 19.1±1.6    | ND            | 130.6   | ND        | ND        | ND          | ND     | 12656.8±20.2  | 20642.5±112.7  |
| 44 | 52.9±8.3   | 162.9±12.1    | 574.2±120.7    | 33.8±0.7    | 823.8   | 325.3±17.7    | 33.6±1.9    | 168.4±13.4    | 527.3   | ND        | ND        | ND          | ND     | 15130.9±112.9 | 25685.6±129.4  |
| 45 | 59.9±13.1  | 101±14.1      | 632.1±156.5    | 38.6±6.7    | 831.6   | 275.5±22.5    | 32.1±2.7    | 117.6±15.5    | 425.2   | ND        | ND        | ND          | ND     | 14716.7±52.1  | 25954.4±90     |
| 46 | 442.8±92.8 | 3943.4±184.5  | 14050.2±934.5  | 317.2±17.7  | 18753.6 | 7234.7±976.4  | 709.3±50.1  | 8179±516.5    | 16123   | 209.5±7.2 | 21.6±0.8  | 839.9±13.2  | 1071   | 80040.9±136.8 | 73408.2±91.3   |
| 47 | 40.6±5.1   | 209.8±20.7    | 530.6±114.7    | 58.3±3.7    | 839.3   | 261±94.9      | 393.9±38.9  | 577.6±43.7    | 1232.5  | ND        | ND        | 51.8±3.7    | 51.8   | 23456.7±43    | 28161.8±187.4  |
| 48 | 70.2±11.7  | 251.1±25.9    | 787.4±35.7     | 71.1±5.2    | 1179.8  | ND            | 373.5±33.3  | 410.5±28.5    | 784     | ND        | ND        | ND          | ND     | 23729.8±43.3  | 37344.5±237.6  |
| 49 | 25.6±5.6   | 31.8±0.9      | 337.1±22.9     | 22.6±1.9    | 417.1   | 207.9±35.4    | 239.7±21    | 99.3±16.6     | 546.9   | ND        | ND        | ND          | ND     | 15256.6±58.3  | 33900.8±144.5  |
| 50 | 37.4±2.7   | 153.7±1.8     | 421.4±73.7     | 27.4±0.9    | 639.9   | 106.6±17.7    | 113.4±4     | 110±3.7       | 330     | ND        | ND        | ND          | ND     | 14895.1±85.9  | 28645.3±235.5  |
| 51 | 71.8±12.1  | 156.6±16.6    | 719.1±159.1    | 39±2        | 986.5   | 116.3±33.8    | 51.5±3.2    | ND            | 167.8   | ND        | ND        | ND          | ND     | 16284.6±24.2  | 28669.8±43.7   |
| 52 | 27±5.7     | ND±6.2        | 360.1±89.2     | 16.2±0.4    | 403.3   | 108.2±28.9    | 124.2±13.7  | ND            | 232.4   | ND        | ND        | ND          | ND     | 13008.2±49.6  | 24928.7±113.6  |
| 53 | 71.4±10.7  | 168.7±17.2    | 772.6±129.2    | 41.7±2.6    | 1054.4  | 160.8±25.2    | 95.9±7.9    | 128.8±11.5    | 385.5   | ND        | ND        | ND          | ND     | 18435±37.4    | 29491.2±193.2  |
| 54 | 279.9±44   | 9854.6±314.6  | 7853.8±1433.7  | 697.7±21.2  | 18686   | 7928.2±622.6  | 853±28.9    | 7941.5±207    | 16722.7 | 329.1±1.4 | ND        | 1062.5±4.5  | 1391.6 | 80351.2±124.4 | 81901.5±360.7  |
| 55 | 37.0±8.2   | ND            | 399.9±76.5     | ND          | 436.9   | 574.5±67.5    | 48.3±3.3    | ND            | 622.8   | ND        | ND        | ND          | ND     | 15189.1±162.9 | 28787.6±48.6   |
| 56 | 38.9±4.6   | 253.7±11      | 564.1±106      | 41.8±1.6    | 898.5   | 346.2±19.3    | 55.9±2.8    | 221.6±15.2    | 623.7   | ND        | ND        | ND          | ND     | 14543.9±55.8  | 28242.6±71.6   |
| 57 | 125.1±17.8 | 490.7±21.6    | 1362.6±220.3   | 46.9±3.6    | 2025.3  | 127.5±25.7    | 243.4±14.1  | 270.1±12.8    | 641     | ND        | ND        | ND          | ND     | 28815.5±80.2  | 37264±107      |
| 58 | 54.2±7.9   | 102.2±9.4     | 639.9±122.3    | 43.4±0.2    | 839.7   | 455.5±16.1    | 43.3±2.8    | 233.6±24.6    | 732.4   | ND        | ND        | ND          | ND     | 14467±50.8    | 27313.3±34     |
| 59 | 107±18.9   | 314.4±27.5    | 1020.5±175.1   | 80.1±5.3    | 1522    | 267.4±56.3    | 505±49.5    | 1178.2±50.5   | 1950.6  | ND        | ND        | 134.2±2.8   | 134.2  | 32642.1±36.2  | 35807.3±221.9  |
| 60 | 67.7±9.6   | 265.6±24.3    | 712.8±114.8    | 49.3±4.1    | 1095.4  | 152.2±36.4    | 211.8±15.6  | 282±21.7      | 646     | ND        | ND        | 6.3±0.5     | 6.3    | 19729.6±117.8 | 31066±93.2     |
| 61 | 48.8±7.7   | 82.4±11.1     | 550.2±81.7     | 32.7±3.4    | 714.1   | 153.3±25.7    | 276.6±14.7  | 208.1±15.5    | 638     | ND        | ND        | ND          | ND     | 15013.5±59.2  | 33708±51.7     |
| 62 | 57±12.3    | 235±21.5      | 634.8±129      | 39.2±2.8    | 966     | 114.7±35.4    | 74.3±6.4    | 129.4±4.7     | 318.4   | ND        | ND        | ND          | ND     | 14250.1±47.1  | 23025±73.2     |
| 63 | 41.8±10.1  | 197.8±30.5    | 639.5±128.1    | 59.7±12     | 938.8   | 220.8±77.2    | 124.2±11.4  | 184.4±28.8    | 529.4   | ND        | ND        | ND          | ND     | 14459.4±26.1  | 23002.7±108.5  |
| 64 | 213.8±36.6 | 4886.7±293.4  | 8805.5±1522.5  | 640.8±31.5  | 14546.8 | 4068.1±583.6  | 725±39.3    | 7576.3±372.2  | 12369.4 | 148.7±3.5 | 33.7±0.8  | 993.1±80.9  | 1175.5 | 79354.2±109.7 | 64442.9±323.9  |
| 65 | 236.5±41.2 | 469.5±16      | 1344.1±227.6   | 71.8±4.6    | 2121.9  | 254±48.4      | 1126.3±49.4 | 812.5±32.6    | 2192.8  | ND        | ND        | ND          | ND     | 42845.9±205.4 | 41012.9±150.4  |
| 66 | 56.6±6.9   | 178.2±12.1    | 635.1±123.3    | 35.6±1.6    | 905.5   | 212.7±62.7    | 127.6±4.1   | 274.2±14.4    | 614.5   | ND        | ND        | 19.1±0.5    | 19.1   | 15515±118.4   | 25506.6±106.6  |
| 67 | 41.1±14.8  | 433.6±30.3    | 737.4±149.6    | 67.7±5.1    | 1279.8  | 1288.3±247.6  | 225.8±19.6  | 987±78.1      | 2501.1  | ND        | ND        | ND          | ND     | 24640.5±213.5 | 28677.9±64.3   |
| 68 | 36.8±15.1  | 87.1±14.1     | 542.3±114.9    | 24.1±1.3    | 690.3   | 301.2±77.2    | 69.3±1.9    | 193.5±24.9    | 564     | ND        | ND        | ND          | ND     | 13318.2±84.9  | 24247.6±149.6  |
| 69 | 50.4±16.7  | 378.4±38.3    | 779.5±141.2    | 73.5±5.3    | 1281.8  | 754.5±140.5   | 189.7±16.8  | 721.7±66.9    | 1665.9  | ND        | ND        | 9.4±1.2     | 9.4    | 23687.7±73.4  | 29763.8±51.1   |
| 70 | 85.5±18.5  | 20.8±3.5      | 685.8±142.8    | 32.1±2      | 824.2   | 688.6±27.3    | 76.7±4.9    | 162.4±16.8    | 927.7   | ND        | ND        | ND          | ND     | 14525.1±239.4 | 23957.7±105    |
| 71 | 40.5±7.9   | 100.2±7.9     | 512.9±86.6     | 25.2±0.9    | 678.8   | ND±           | 113.8±1.3   | 130.9±14.1    | 244.7   | ND        | ND        | ND          | ND     | 14194.3±80.1  | 22674.1±16.8   |
| 72 | 38.3±15.6  | 114.8±14.4    | 512.8±123.7    | 43±3.2      | 708.9   | 331.7±46.6    | 129.8±14.5  | 212.9±18.1    | 674.4   | ND        | ND        | ND          | ND     | 12850.7±50    | 23507.5±55.2   |
| 73 | 47.6±10.6  | 83.9±13.8     | 529.6±136      | 23.5±1.4    | 684.6   | 256.2±28.9    | 33.2±2.8    | 110.5±16.2    | 399.9   | ND        | ND        | ND          | ND     | 13290±75.6    | 27225.8±66.4   |
| 74 | 64.6±0.8   | 421.6±30.8    | 729.3±160.1    | 86.7±7.7    | 1302.2  | 359.1±32.2    | 86.8±3.7    | 550.4±48      | 996.3   | ND        | ND        | 4.7±0.7     | 4.7    | 23268.6±194.7 | 28972.7±82.3   |
| 75 | 49.3±11.5  | 125.3±17.9    | 577.9±134.4    | 28.2±2.4    | 780.7   | 386.4±53.1    | 69.4±8.2    | 139.1±21.7    | 594.9   | ND        | ND        | ND          | ND     | 13654.5±179.8 | 26588.1±46.1   |
| 76 | 50.5±19    | 897.7±79.7    | 892.7±197.7    | 160.6±5.1   | 2001.5  | 145.8±42.2    | 247.5±25.5  | 649.1±47.8    | 1042.4  | ND        | ND        | 71.9±6.7    | 71.9   | 31135.7±273.5 | 31077.7±264.2  |
| 77 | 42.2±10.3  | 173.2±35.9    | 509.3±99.9     | 35.8±4.9    | 760.5   | 99.7±18.4     | 45.2±5.4    | 45.4±18.3     | 190.3   | ND        | ND        | ND          | ND     | 14230.3±91.1  | 29033.8±17.2   |
| 78 | 71.6±15.3  | 145.3±32.2    | 736.2±148.2    | 28±2.6      | 981.1   | 94.3±16.7     | 83.5±8.4    | 102.6±19      | 280.4   | ND        | ND        | ND          | ND     | 16641.8±56.4  | 32777±117.2    |
| 79 | 64.7±12.7  | 147.6±22.6    | 782.1±132.3    | 33.9±3.2    | 1028.3  | 114.7±9.5     | 252.2±27.3  | 494.4±38.9    | 861.3   | ND        | ND        | 31.5±1.6    | 31.5   | 17538.8±60    | 33453.6±327.7  |
| 80 | 57.2±12.3  | 327.5±33.2    | 702.8±137.5    | 48.8±4.7    | 1136.3  | 395.5±61.3    | 179.3±17.1  | 674.1±49.6    | 1248.9  | ND        | ND        | 73.3±4.5    | 73.3   | 22643.8±57    | 31940.5±95.5   |
| 81 | 34.4±3.6   | 115.3±2.3     | 491±4.3        | 24.2±0.3    | 664.9   | 468.4±6.4     | 79.6±1      | 130.9±0.5     | 678.9   | ND        | ND        | ND          | ND     | 14187.6±48.6  | 24444.6±64.8   |
| 82 | 26.2±4.4   | 789.4±12.1    | 564.1±15.7     | 155.1±2.1   | 1534.8  | 79.3±3.2      | 212.4±1.4   | 526.2±12.3    | 817.9   | ND        | ND        | 59±3.6      | 59     | 27383.6±169.6 | 27438.1±52.2   |
| 83 | 40.6±2     | 265.2±0.4     | 514.6±9.9      | 37.4±0.6    | 857.8   | 421.8±8       | 31.2±0.4    | 170.8±2.1     | 623.8   | ND        | ND        | ND          | ND     | 17458.8±100.3 | 25713.2±313.7  |
| 84 | 263.7±46.5 | 4215.3±112.9  | 8355.2±1981.4  | 1006±104.1  | 13840.2 | 4384.8±273.3  | 910.2±41.7  | 5897±214.2    | 11192   | ND        | ND        | 581.6±23.8  | 581.6  | 70220.3±59.5  | 63307.5±120.5  |
| 85 | 104.1±24.3 | 359.7±16.2    | 1811±409.5     | 165.1±0.5   | 2439.9  | ND±           | 89.7±4.9    | 460.7±27.5    | 550.4   | ND        | ND        | 12.4±0.4    | 12.4   | 23370.4±36.7  | 25479.6±59.8   |
| 86 | 227.6±60.9 | 14937.1±217.3 | 13693.9±2736.2 | 830±27.1    | 29688.6 | 6190.8±1214.5 | 569.5±15.9  | 11453.4±419.2 | 18213.7 | 133.8±2.5 | 107.8±4.6 | 3986.2±99.5 | 4227.8 | 80349.7±130.8 | 105062.8±426.1 |
| 87 | 107±17.1   | 2380.7±48.2   | 3598.8±645.5   | 496.4±18.6  | 6582.9  | 922.8±132     | 229.2±8.9   | 2229±66.2     | 3381    | ND        | ND        | 253.2±4.9   | 253.2  | 54472.5±162   | 41433±393      |
| 88 | 282.1±48.7 | 7929.9±109.6  | 11683.6±2232.3 | 1497.6±47.9 | 21393.2 | 2038.6±277.3  | 367.3±13.3  | 5419.2±120.8  | 7825.1  | 41.8±1.1  | 38.1±0.7  | 1530.4±20.6 | 1610.3 | 74041.5±64    | 79562.4±407.2  |
| 89 | 131.6±20.5 | 3261.8±149.5  | 3530.3±592.5   | 439.1±22.2  | 7362.8  | 1379.4±153.7  | 371.6±17.7  | 2948±71.7     | 4699    | ND        | ND        | 432.7±3.7   | 432.7  | 61821.5±112.2 | 45358±367.8    |

|     |            |              |                |             |         |                |              |               |         |           |           |             |        |               |               |
|-----|------------|--------------|----------------|-------------|---------|----------------|--------------|---------------|---------|-----------|-----------|-------------|--------|---------------|---------------|
| 90  | 294.9±48   | 4688.7±102.9 | 9833.7±1552.5  | 436.8±24.5  | 15254.1 | 5429.8±1014.5  | 916.8±38.4   | 13264.8±384.5 | 19611.4 | 70.8±3.5  | 51.8±1.4  | 2043.9±29.9 | 2166.5 | 71232.8±337.2 | 72287.4±289.9 |
| 91  | 126.8±21.5 | 3837.4±137.4 | 4574.8±1029.5  | 390.1±13.3  | 8929.1  | 5687±764.9     | 308.9±15.1   | 5383.9±225.6  | 11379.8 | ND        | ND        | 431.6±12.6  | 431.6  | 65613.6±229.7 | 45977.1±109   |
| 92  | 169.4±24.3 | 7143.3±165.6 | 7485.5±1185.8  | 852.8±40.8  | 15651   | 5915.3±1592.4  | 1841.8±197.4 | 14343.4±485.9 | 22100.5 | 85.4±1.6  | 51.1      | 1999.8±14.5 | 2136.3 | 78438.2±129.1 | 76222.7±301.4 |
| 93  | 130.3±23.1 | 4426.7±104.1 | 5314.2±1031    | 419.4±13.9  | 10290.6 | 2172.6±459.1   | 146±23.4     | 4055±252.9    | 6373.6  | ND        | ND±0.3    | 545.3±5.4   | 545.3  | 73953.3±62    | 55883±113     |
| 94  | 149.1±29.1 | 4033.5±661.1 | 4746±889.5     | 634.9±53    | 9563.5  | 1679±255.6     | 340.5±1.3    | 3449.3±63.4   | 5468.8  | ND        | ND±0.2    | 481.4±10.1  | 481.4  | 68100.5±127.8 | 54043.3±161.2 |
| 95  | 121±17.9   | 408.4±19.7   | 1853.3±304.5   | 101.9±8     | 2484.6  | 798.5±125.3    | 180.6±7.6    | 722.2±32.7    | 1701.3  | ND        | ND        | 11.1±0.1    | 11.1   | 33427.2±28.9  | 32919.8±45.6  |
| 96  | 210.3±41.7 | 610.7±48.5   | 2984.6±507.3   | 139.8±7.6   | 3945.4  | 2116.8±66      | 166.8±13.1   | 790.5±52.2    | 3074.1  | ND        | ND        | ND          | ND     | 38423.8±61.3  | 31491.7±58.8  |
| 97  | 319.8±58.2 | 6994.5±36.4  | 11183.5±2057.4 | 626±15.1    | 19123.8 | 5120±673.9     | 665.3±28     | 10844.9±399.5 | 16630.2 | 113±2.3   | 57.1±1.2  | 1924.4±17.5 | 2094.5 | 80370.7±64.1  | 74886.9±233.9 |
| 98  | 427.8±70.2 | 7144.6±75.5  | 13069.7±2167.4 | 447.7±16.5  | 21089.8 | 9390.1±830.1   | 489.2±14.8   | 8985.9±216    | 18865.2 | 80.5±2.3  | 35.9±0.5  | 1397.7±17   | 1514.1 | 79648.2±161.2 | 68773.9±190.3 |
| 99  | 153.8±20   | 3111.7±59.2  | 4398.7±777     | 678.4±20    | 8342.6  | 948.5±150.6    | 258.6±8.4    | 2700.9±32.2   | 3908    | ND        | ND        | 434.1±7.5   | 434.1  | 62998.4±169.5 | 40880.1±222.5 |
| 100 | 99.6±12.5  | 3922.2±82.3  | 3350.4±556.8   | 736.9±15.5  | 8109.1  | 881±200.1      | 321.5±10.7   | 3161.5±84.2   | 4364    | 25.1±1    | 4.6±0.6   | 566.8±10.2  | 596.5  | 65334.6±111.7 | 46852.5±195.6 |
| 101 | 282.3±40.3 | 3297.2±9.2   | 8686.8±1116.2  | 308.6±24.5  | 12574.9 | 3732±856.5     | 620.7±44.6   | 9973.9±207.8  | 14326.6 | 80.9±4.4  | 32.8±1    | 1278.6±28.8 | 1392.3 | 72649.2±172.8 | 61530.2±373.1 |
| 102 | 191.2±27.2 | 10274.2±143  | 9044.9±1596.7  | 1353.6±54.4 | 20863.9 | 2811.4±468.5   | 485.7±16.1   | 9905±228.1    | 13202.1 | 422.9±6.9 | 201.3±2.2 | 5013.6±14.4 | 5637.8 | 81310.3±211.1 | 90737.5±230.6 |
| 103 | 185.6±27.6 | 7435.7±74.5  | 8719.3±1466    | 1053.5±68.6 | 17394.1 | 6448±714.9     | 447.2±16.3   | 7780.1±161.8  | 14675.3 | 47.4±1.7  | 11.9±1.3  | 751.1±14.9  | 810.4  | 75552.7±133.7 | 70445.4±335.7 |
| 104 | 176±23.9   | 7396.8±137.3 | 8889.3±1458.2  | 826.7±11    | 17288.8 | 9173.6±1097.7  | 522.4±15.7   | 9775.8±194.1  | 19471.8 | 69.9±2.1  | 19.8±1.7  | 944.4±23.7  | 1034.1 | 74776.3±107.8 | 64867±644.7   |
| 105 | 466.1±66   | 4019.8±110.3 | 14448.3±1885   | 459.9±17.2  | 19394.1 | 12142.5±2559.3 | 1280.1±116.3 | 22148.5±702   | 35571.1 | 338.9±4   | 140.8±4.4 | 3759.2±71.4 | 4238.9 | 80381.5±71.4  | 77323.1±238.9 |
| 106 | 86.8±15.3  | 2388.2±60.8  | 2627.5±386.5   | 366.2±9.9   | 5468.7  | 2121.1±74.9    | 289.2±10.6   | 3987.4±90.5   | 6397.7  | ND        | ND        | 140.8±3.0   | 140.8  | 42517±70.8    | 30658.8±61.3  |
| 107 | 485.2±60.9 | 5267.6±63.5  | 10573.3±1639.7 | 1054.9±52.9 | 17381   | 3019.3±80.7    | 244.3±8.9    | 7208.3±105.3  | 10471.9 | ND        | ND        | 162.3±1.7   | 162.3  | 59378±605.2   | 42327.1±472.1 |
| 108 | 278.1±44.5 | 14676.3±81.3 | 14187.6±2073.8 | 2209.3±114  | 31351.3 | 7429.8±1238.5  | 2691.6±138.7 | 31121±395.2   | 41242.4 | 32.7±1.4  | 52.0±0.5  | 2721.5±10.1 | 2806.2 | 79116.5±91.2  | 79292.8±574.9 |
| 109 | 109.2±2.1  | 2775.8±21.8  | 2235.9±4.5     | 749.9±21.5  | 5870.8  | 585.7±4.8      | 210.2±2.8    | 2010.4±2.4    | 2806.3  | ND        | ND        | 33.6±3.7    | 33.6   | 27719.9±45.1  | 31181±11.2    |
| 110 | 113.7±14.9 | 4006.1±33.4  | 3888.7±550.7   | 478.7±5.1   | 8487.2  | 5177.9±99.5    | 513.2±7.6    | 6395.1±118.2  | 12086.2 | ND        | ND        | 40.0±1.5    | 40.0   | 45623.5±48.2  | 36073.8±191.1 |
| 111 | 46.4±1.6   | 2007.5±9.5   | 1283.9±19.8    | 286.8±0.7   | 3624.6  | 669.3±168.8    | 392.5±17.1   | 3745.6±5      | 4807.4  | ND        | ND        | 245.3±7.5   | 245.3  | 49440.2±26    | 34598.8±113.4 |
| 112 | 412.7±56.1 | 1777.4±50.4  | 7146.8±1087.7  | 703±62.6    | 10039.9 | 10449.1±384.3  | 320.4±13.2   | 2086.7±76.8   | 12856.2 | 14.2±1.2  | 16.5±0.6  | 1135.4±7.8  | 1166.1 | 73836.5±52.8  | 57335.7±245.5 |
| 113 | 78.9±11.1  | 2764.4±12.2  | 2698.5±297     | 448.4±1.9   | 5990.2  | 4364.4±287.1   | 342.6±18.6   | 3435.2±31.9   | 8142.2  | ND        | ND        | 164.6±0.9   | 164.6  | 64080.5±37    | 43672.3±173.8 |

ND = Not detected, values are either below the limit of quantification or limit of detection. 3-CQA, 3-*O*-caffeoylquinic acid; 5-CQA, 5-*O*-caffeoylquinic acid; 2,3-DCTA, 2,3-di-*O*-caffeoyltartaric acid; 3,5-DCQA, 3,5-di-*O*-caffeoylquinic acid; Q3-G, quercetin 3-*O*-glucuronide; L7-G, luteolin 7-*O*-glucuronide; Q3-6"MG, quercetin 3-*O*-(6"-*O*-malonyl)glucoside; C3-G, cyanidin 3-*O*-glucoside; C3-3"MG, cyanidin 3-*O*-(3"-*O*-malonyl)glucoside; C3-6"MG, cyanidin 3-*O*-(6"-*O*-malonyl)glucoside; ABTS, 2,2'-azinobis(3-ethylbenzothiazoline-6-sulfonic acid) radical scavenging activity; TPC, total phenolic content.
